# Supplementary material for: Mixed-solvent strategy for solvothermal synthesis of well-dispersed YBO3:Ce3+,Tb3+ nanocrystals
Source: Royal Society of Chemistry journal article supplement (doi:10.1039/c3ra47864e), 2014-01-01
Supplement: c3ra47864e1.pdf [file c3ra47864e1.pdf]

## **Electronic supplementary information**

### **Mixed-solvent strategy for solvothermal synthesis of well-dispersed $\text{YBO}_3:\text{Ce}^{3+},\text{Tb}^{3+}$ nanocrystals**

Akihiro Nohara, Satoru Takeshita\* and Tetsuhiko Isobe\*

Department of Applied Chemistry, Faculty of Science and Technology,  
Keio University, 3-14-1 Hiyoshi, Kohoku-ku, Yokohama 223-8522, Japan

## Additional figures

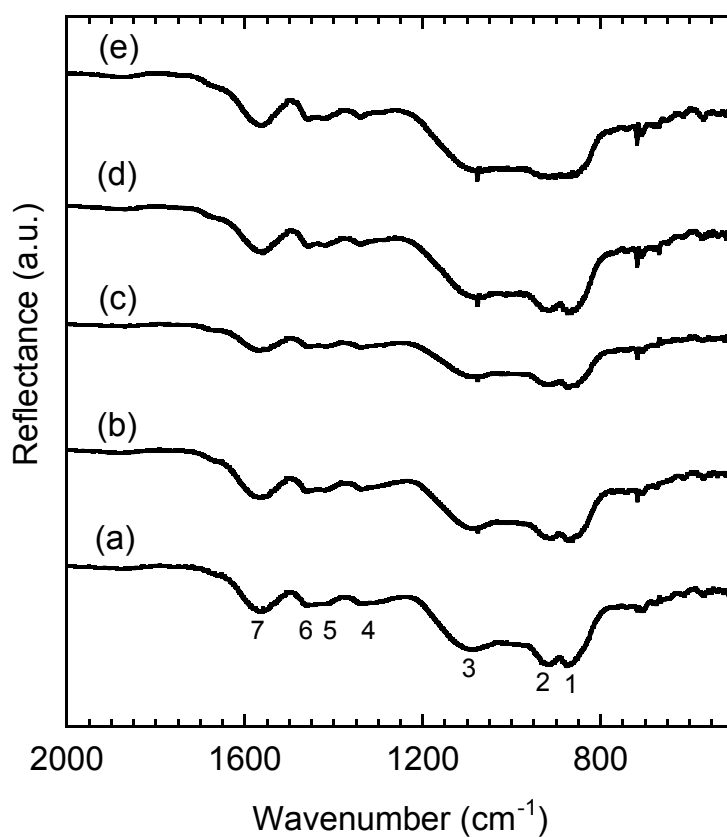

**Fig. S1** FT-IR spectra of powdered samples prepared at different water contents: (a) W2.5, (b) W25, (c) W50, (d) W75, and (e) W100. The peaks 1–3 in the region of 800–1200 cm<sup>-1</sup> are assigned to vibrations of borate anions in the vaterite-type YBO<sub>3</sub>.<sup>S1–S4</sup> The peaks 4 and 6 at 1335 and 1460 cm<sup>-1</sup>, respectively, are assigned to vibrations of CH<sub>2</sub> groups in 1,4-butanediol and/or acetate ions.<sup>S4,S5</sup> The peaks 5 and 7 at 1420 and 1563 cm<sup>-1</sup>, respectively, are assigned to symmetric and asymmetric vibrations, respectively, of COO<sup>-</sup> groups in acetate ions.<sup>S4,S5</sup>

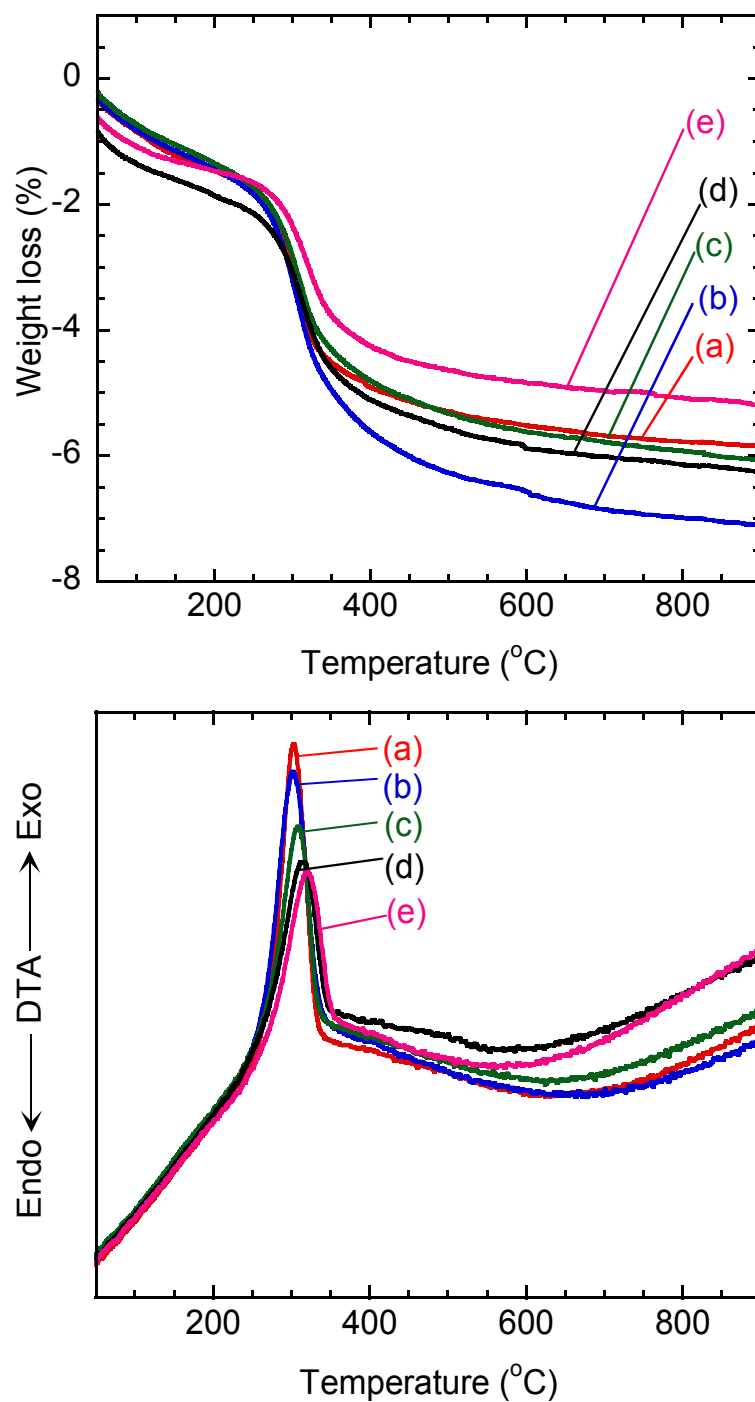

**Fig. S2** TG (top) and DTA (bottom) profiles of powdered samples prepared at different water contents: (a) W2.5, (b) W25, (c) W50, (d) W75, and (e) W100. The exothermic weight loss at 250–400 °C corresponds to combustion of 1,4-butanediol and acetate ions.<sup>S5</sup>

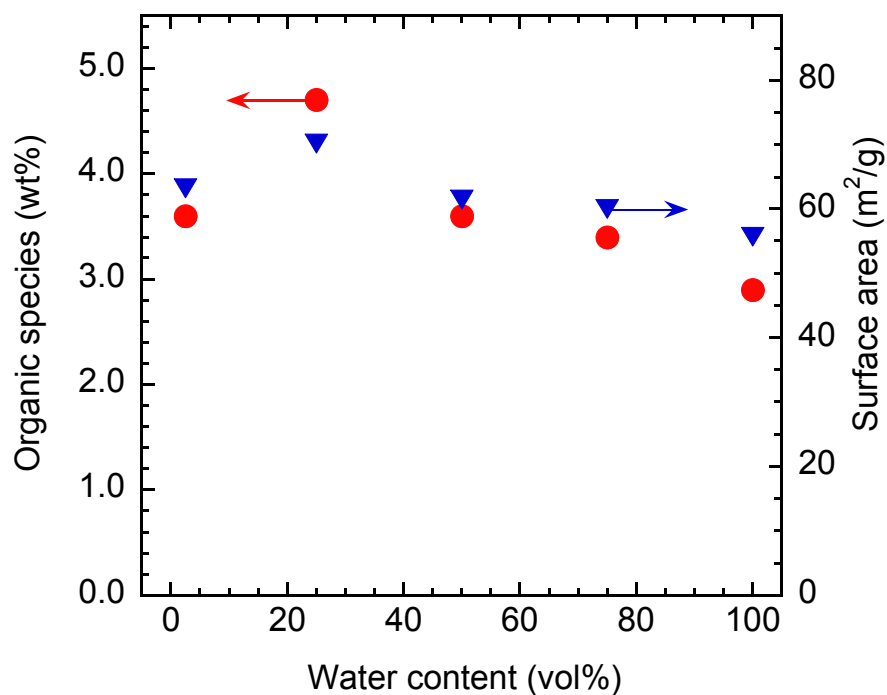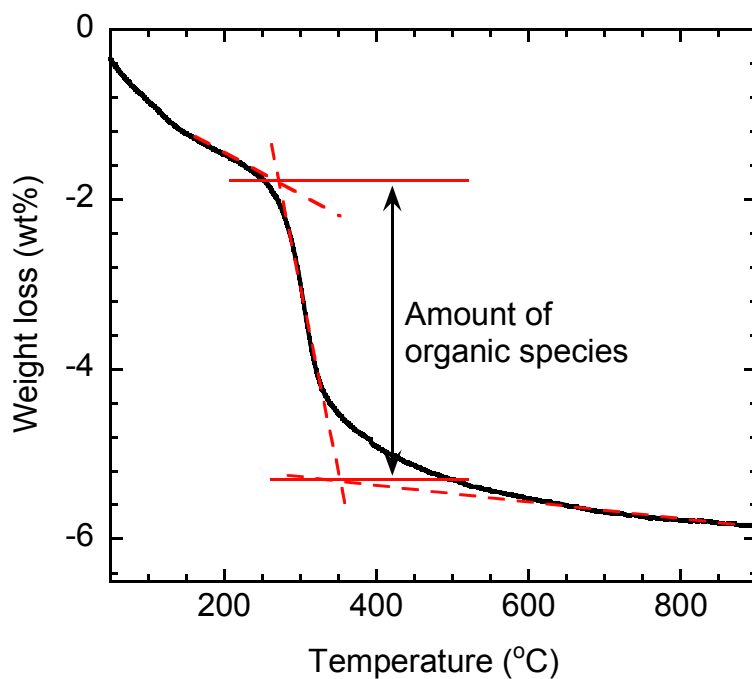

**Fig. S3** Changes in amount of organic species (●) and specific surface area (▼) with water content. The amount of organic species shows a similar tendency with the specific surface area. Definition of the amount of organic species is also shown in the bottom illustration.

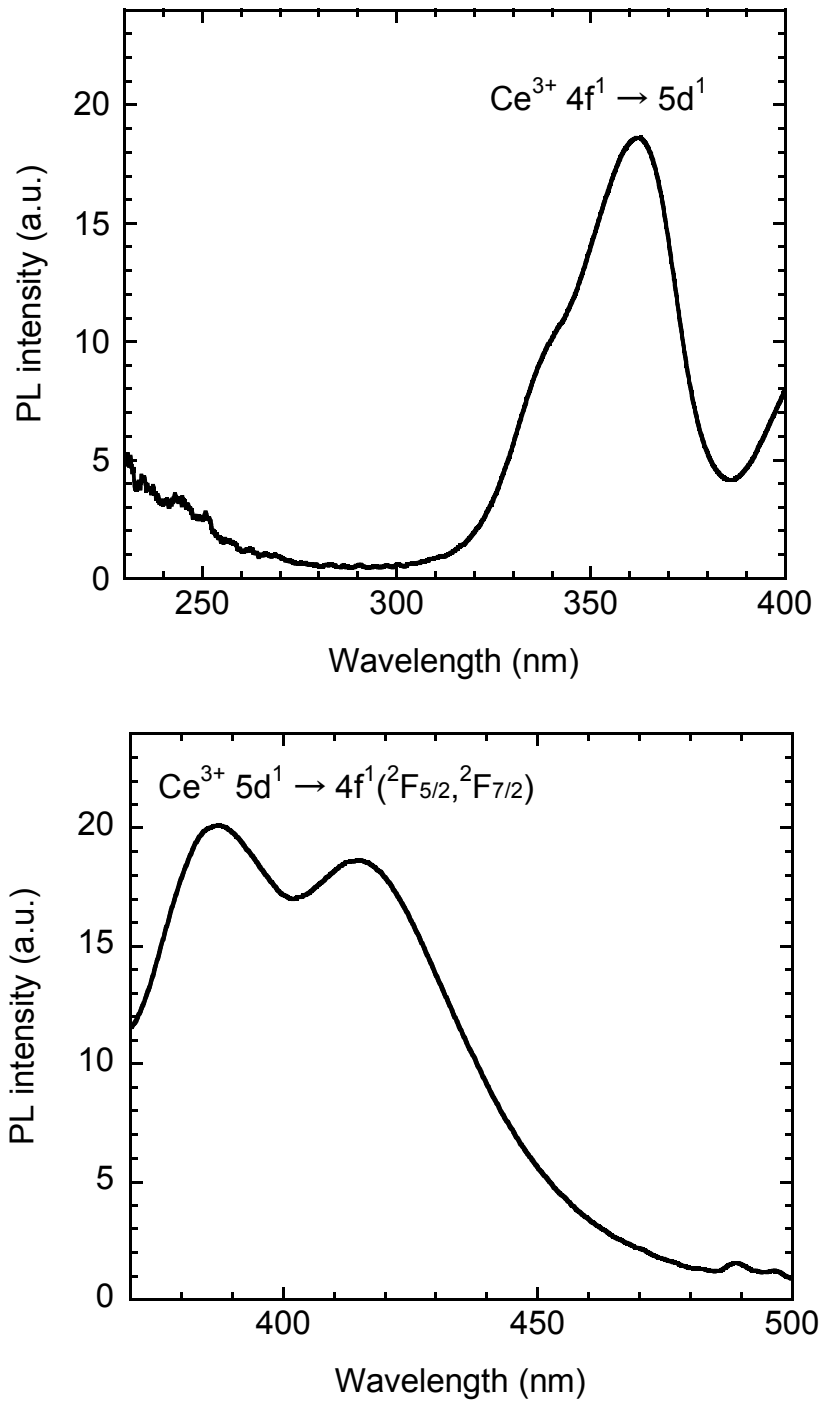

**Fig. S4** PLE (top) and PL (bottom) spectra of powdered sample of Ce<sup>3+</sup>-monodoped YBO<sub>3</sub>.  $\lambda_{\text{ex}} = 360$  nm and  $\lambda_{\text{em}} = 416$  nm.

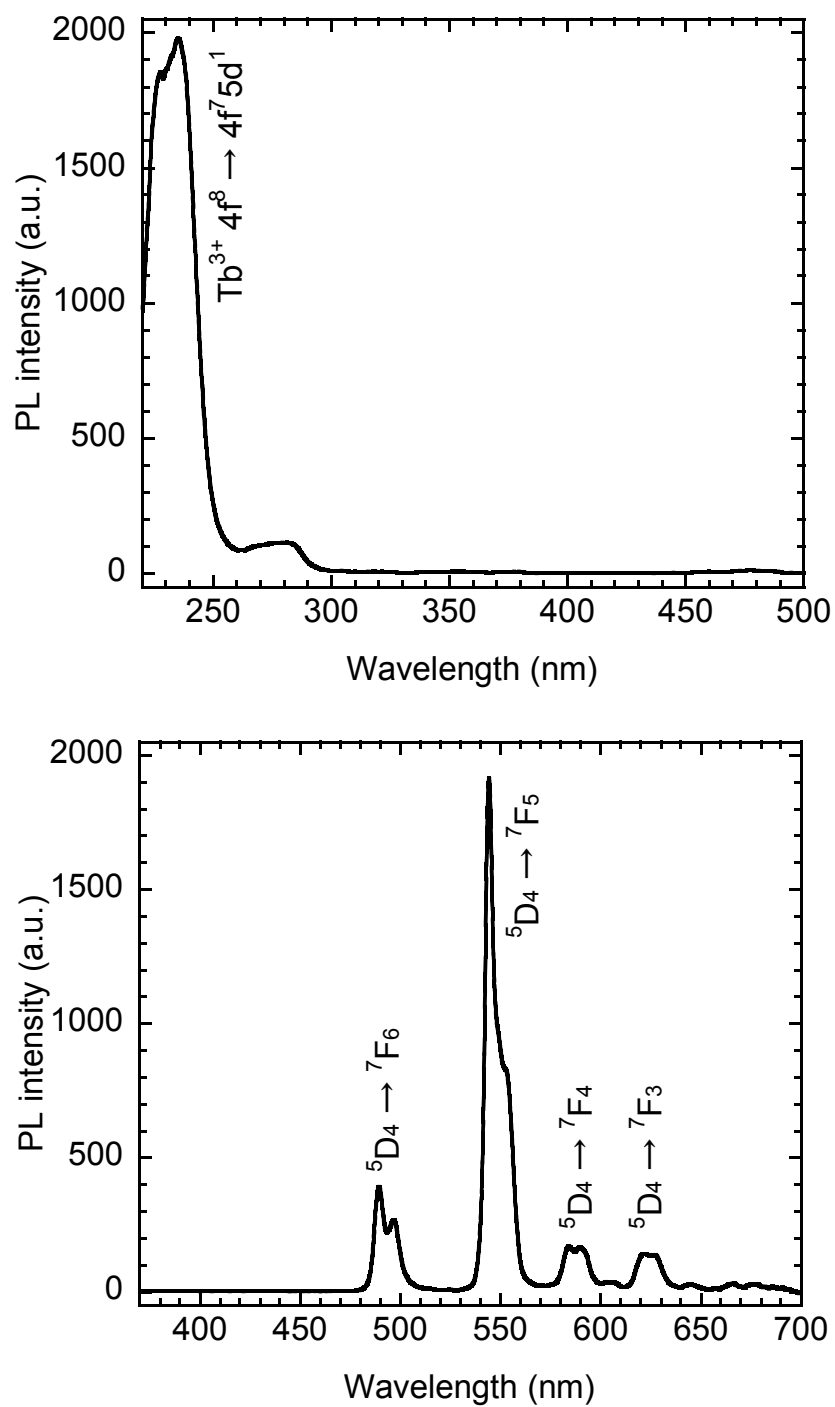

**Fig. S5** PLE (top) and PL (bottom) spectra of powdered sample of  $\text{Tb}^{3+}$ -monodoped  $\text{YBO}_3$ .  $\lambda_{\text{ex}} = 235$  nm and  $\lambda_{\text{em}} = 544$  nm.

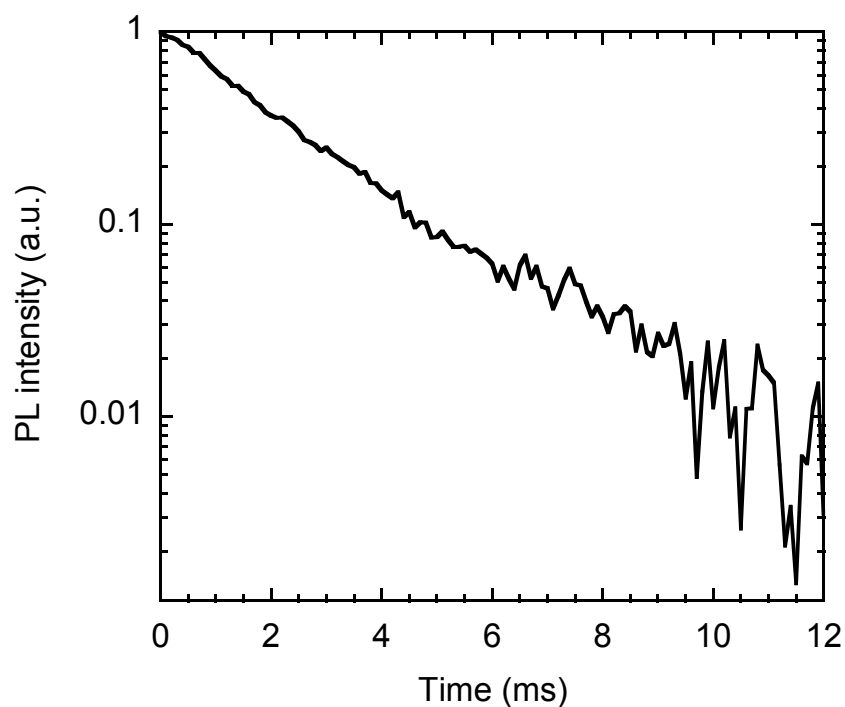

**Fig. S6** PL decay curve for  ${}^5D_4 \rightarrow {}^7F_5$  emission of powdered sample of W75.  $\lambda_{\text{ex}} = 360$  nm and  $\lambda_{\text{em}} = 544$  nm.

## References

- S1 G. Jia, P. A. Tanner, C.-K. Duan and J. Dexpert-Ghys, *J. Phys. Chem. C*, 2010, **114**, 2769–2775.
- S2 Z. Wei, L. Sun, C. Liao, J. Yin, X. Jiang and C. Yan, *J. Phys. Chem. B*, 2002, **106**, 10610–10617.
- S3 M. Tukia, J. Hölsa, M. Lastusaari and J. Niittykoski, *Opt. Mater.*, 2005, **27**, 1516–1522.
- S4 H. Hara, S. Takeshita, T. Isobe, Y. Nanai, T. Okuno, T. Sawayama and S. Niikura, *J. Alloys Compd.*, 2013, **577**, 320–326.
- S5 R. Kasuya, T. Isobe, H. Kuma and J. Katano, *J. Phys. Chem. B*, 2005, **109**, 22126–22130.
